# Supplementary material for: Isoselective 4-methylpentene polymerization by pyridylamido hafnium catalysts
Source: Royal Society of Chemistry journal article supplement (doi:10.1039/d1py00557j), 2021-01-01
Supplement: d1py00557j1.pdf [file d1py00557j1.pdf]

# SUPPORTING INFORMATION

## Isosselective 4-Methylpentene Polymerization by Pyridylamido Hafnium Catalysts

Lingzhi Wang,<sup>a</sup> Donghui Li,<sup>a</sup> He Ren,<sup>b</sup> Yuru Wang,<sup>b</sup> Wei Wu,<sup>b</sup> Yuxin Gao,<sup>b</sup> Xiong  
Wang,<sup>c</sup> and Haiyang Gao<sup>\*a</sup>

<sup>a</sup> School of Materials Science and Engineering, PCFM Lab, GD HPPC Lab, Sun Yat-sen University, Guangzhou 510275, China.

<sup>b</sup> Daqing Chemical Engineering Research Center, Petrochemical Research Institute, CNPC, Daqing 163714, China.

<sup>c</sup> Lanzhou Petrochemical Research Center, Petrochemical Research Institute, PetroChina, Lanzhou 730060, China.

\* Corresponding author. Fax: +86-20-84114033. Tel.: +86-20-84113250. E-mail: Gao H.: gaohy@mail.sysu.edu.cn

### Content

|                                                            |   |
|------------------------------------------------------------|---|
| 1. Characterization of Pyridylamido Hafnium Complexes..... | 2 |
| 2. GPC traces of polymers .....                            | 4 |
| 3. DSC curves of polymers .....                            | 5 |
| 4. NMR characterizations of polymers .....                 | 7 |
| 5. XRD patterns of polymers .....                          | 8 |

## 1. Characterization of Pyridylamido Hafnium Complexes

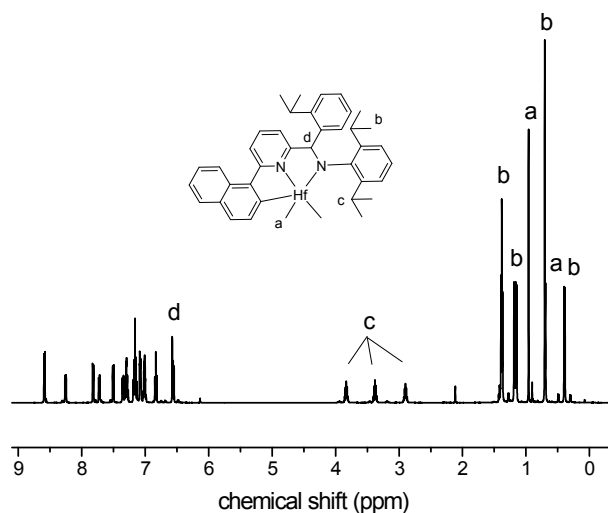

**Figure S1.** <sup>1</sup>H NMR spectrum of complex 1 in C<sub>6</sub>D<sub>6</sub>.

<sup>1</sup>H NMR (C<sub>6</sub>D<sub>6</sub>, 400 MHz): δ (ppm) 8.58 (d, 1H, Nap-*H*), 8.25 (d, 1H, Nap-*H*), 7.81 (d, 1H, Nap-*H*), 7.72 (d, 1H, Nap-*H*), 7.50 (d, 1H, Py-*H*), 7.36-7.00 (m, 9H, Ar-*H*), 6.83 (d, 1H, Py-*H*), 6.57 (s, 1H, NCH), 6.55 (d, 1H, Py-*H*), 3.83 (sept, 1H, CH(CH<sub>3</sub>)<sub>2</sub>), 3.34 (sept, 1H, CH(CH<sub>3</sub>)<sub>2</sub>), 2.90 (sept, 1H, CH(CH<sub>3</sub>)<sub>2</sub>), 1.38 (d, 3H, CH(CH<sub>3</sub>)<sub>2</sub>), 1.36 (d, 3H, CH(CH<sub>3</sub>)<sub>2</sub>), 1.19 (d, 3H, CH(CH<sub>3</sub>)<sub>2</sub>), 1.15 (d, 3H, CH(CH<sub>3</sub>)<sub>2</sub>), 0.96 (s, 3H, Hf-CH<sub>3</sub>), 0.71 (d, 3H, CH(CH<sub>3</sub>)<sub>2</sub>), 0.69 (s, 3H, Hf-CH<sub>3</sub>), 0.39 (d, 3H, CH(CH<sub>3</sub>)<sub>2</sub>).

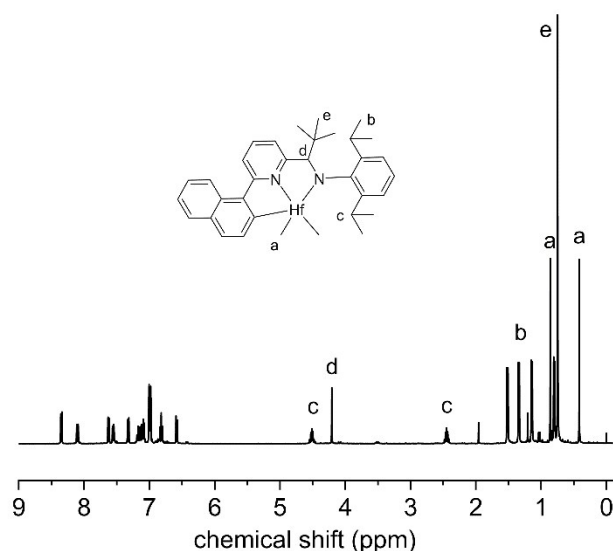

**Figure S2.**  $^1\text{H}$  NMR spectrum complex **2** in  $\text{C}_6\text{D}_6$ .

$^1\text{H}$  NMR ( $\text{C}_6\text{D}_6$ , 400 MHz):  $\delta$  (ppm) 8.53 (d, 1H, Nap-*H*), 8.28 (d, 1H, Nap-*H*), 7.80 (d, 1H, Nap-*H*), 7.73 (d, 1H, Nap-*H*), 7.50 (d, 1H, Py-*H*), 7.36-7.25 (m, 4H, Ar-*H*), 7.03-6.97 (m, 2H, Ar-*H*), 6.76 (d, 1H, Py-*H*), 4.68 (sept, 1H,  $\text{CH}(\text{CH}_3)_2$ ), 4.37 (s, 1H, NCH), 2.62 (sept, 1H,  $\text{CH}(\text{CH}_3)_2$ ), 1.78 (d, 3H,  $\text{CH}(\text{CH}_3)_2$ ), 1.61 (d, 3H,  $\text{CH}(\text{CH}_3)_2$ ), 1.41 (d, 3H,  $\text{CH}(\text{CH}_3)_2$ ), 1.12 (s, 3H, Hf- $\text{CH}_3$ ), 1.08 (d, 3H,  $\text{CH}(\text{CH}_3)_2$ ), 1.00 (s, 9H,  $\text{C}(\text{CH}_3)_3$ ), 0.67 (s, 3H, Hf- $\text{CH}_3$ ).

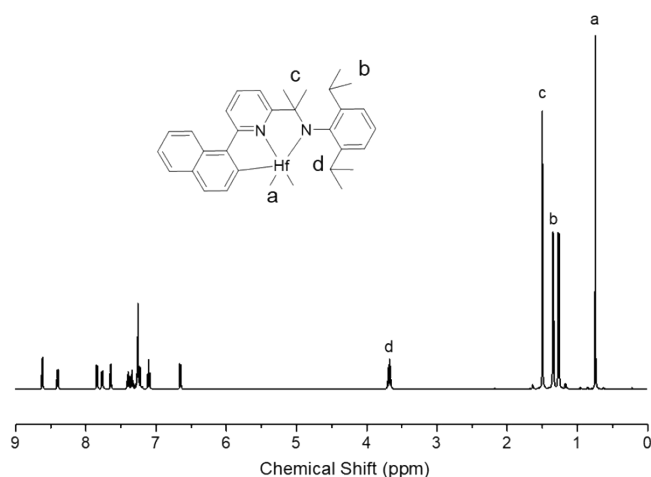

**Figure S3.**  $^1\text{H}$  NMR spectrum of complex **3** in  $\text{C}_6\text{D}_6$ .

$^1\text{H}$ NMR ( $\text{C}_6\text{D}_6$ , 400 MHz):  $\delta$  (ppm) 8.56 (d, 1H, Ar-*H*), 8.35 (d, 1H, Ar-*H*), 7.78 (d, 1H, Ar-*H*), 7.70 (dd, 1.5 Hz, 1H, Ar-*H*), 7.57 (d, 1H, Ar-*H*), 7.35-7.18 (m, 4H, Ar-*H*), 7.02

(t, 1H, Ar-*H*), 6.57 (d, 1H, Ar-*H*), 3.61 (sept, 2H, CH(CH<sub>3</sub>)<sub>2</sub>), 1.43 (s, 6H, (CH<sub>3</sub>)<sub>2</sub>C),  
1.28 (d, 6H, CH(CH<sub>3</sub>)<sub>2</sub>), 1.20 (d, 6H, CH(CH<sub>3</sub>)<sub>2</sub>), 0.69 (s, 6H, Hf-CH<sub>3</sub>).

## 2. GPC traces of polymers

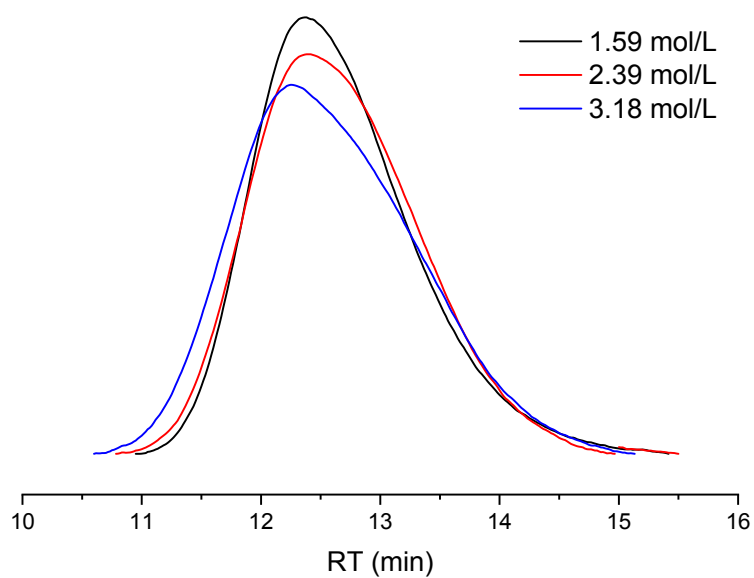

**Figure S4.** GPC traces of PMPs produced by **1** at different monomer concentrations.

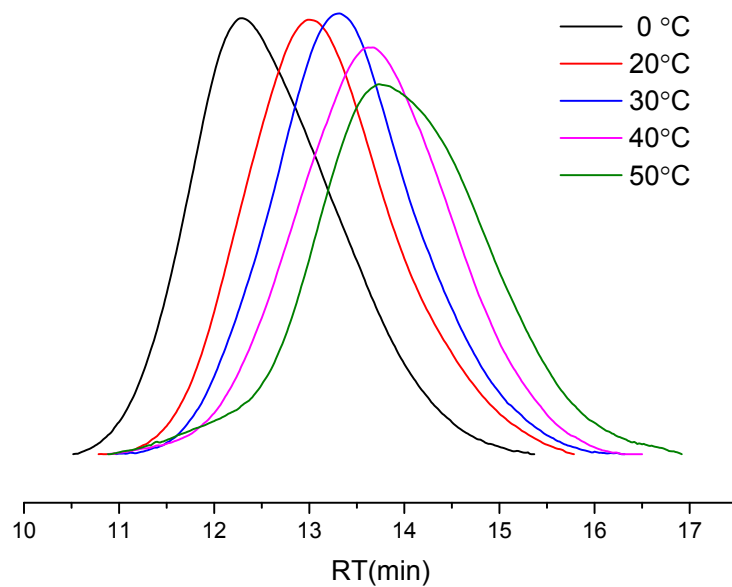

**Figure S5.** GPC traces of PMPs produced by **2** at different temperatures.

### 3. DSC curves of polymers

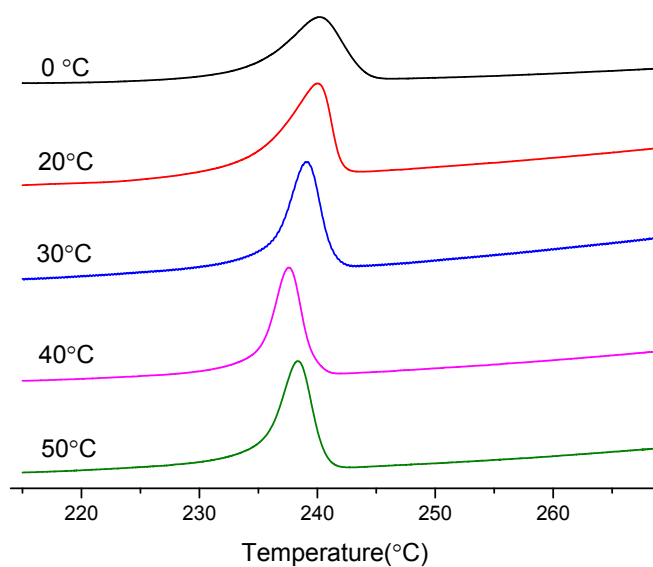

**Figure S6.** DSC curves of PMPs produced by **1** at different temperatures.

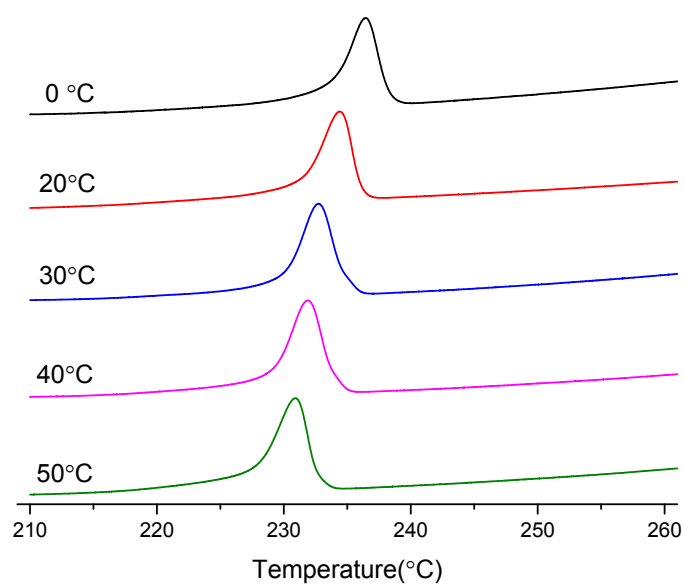

**Figure S7.** DSC curves of PMPs produced by **2** at different temperatures.

#### 4. NMR characterization of polymers

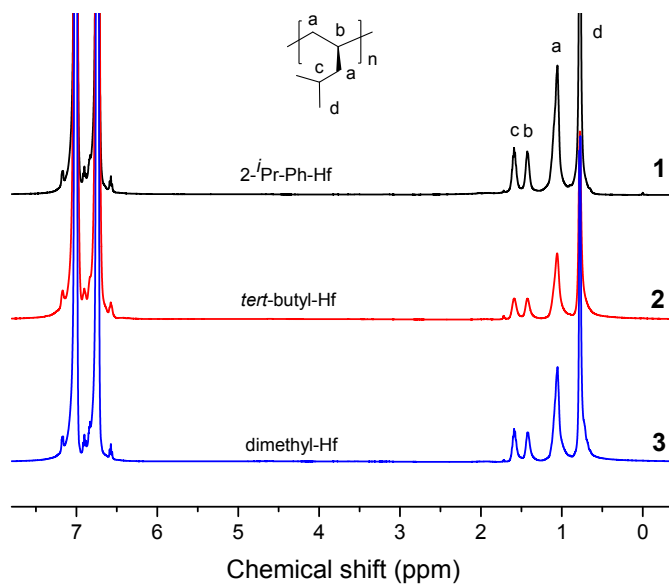

**Figure S8.**  $^1\text{H}$  NMR spectra of PMPs produced by **1**, **2**, and **3** at 40 °C.

## 5. XRD patterns of polymers

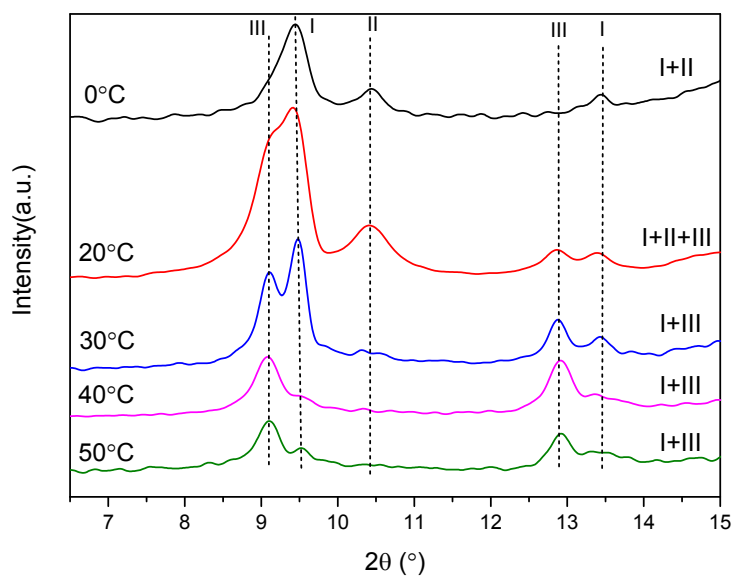

**Figure S9.** Magnified X-ray powder diffraction patterns of PMPs produced by **1** at different temperatures.

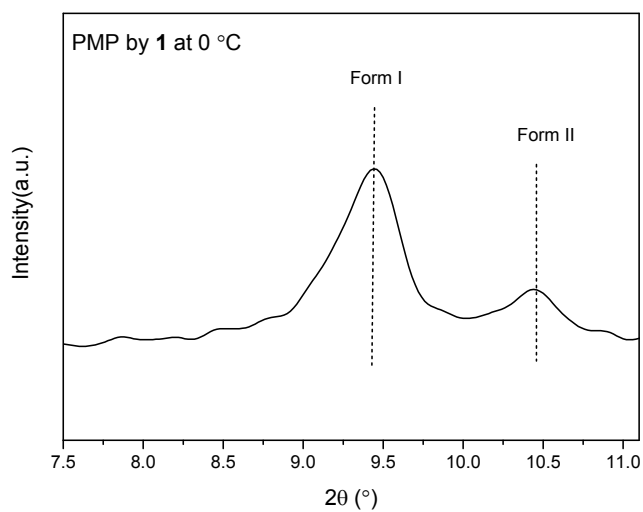

**Figure S10.** Peak separation of the X-ray diffraction patterns by **1** at 0 °C.

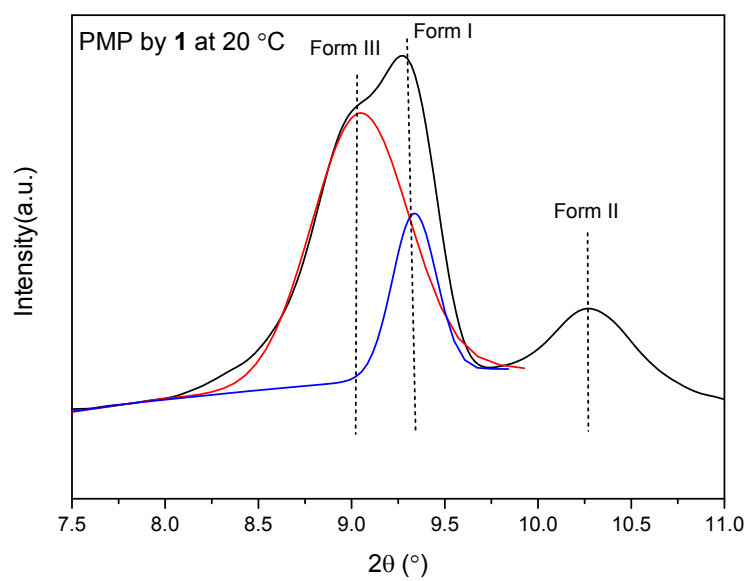

**Figure S11.** Peak separation of the X-ray diffraction patterns by **1** at 20 °C.

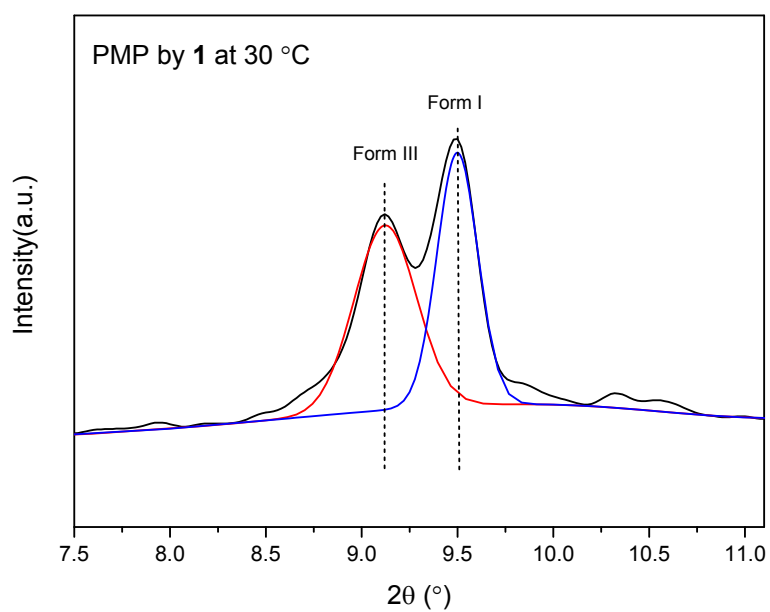

**Figure S12.** Peak separation of the X-ray diffraction patterns by **1** at 30 °C.



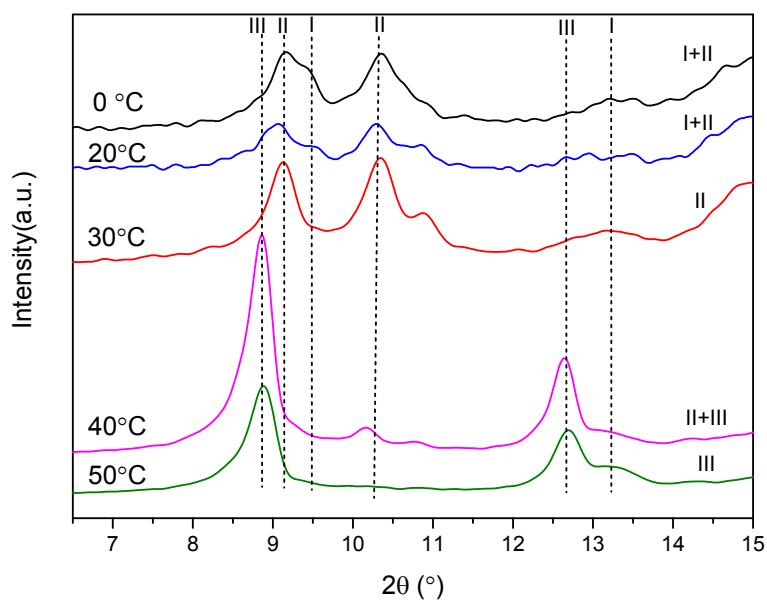

**Figure S13.** Magnified X-ray powder diffraction patterns of PMPs produced by **2** at different temperatures.

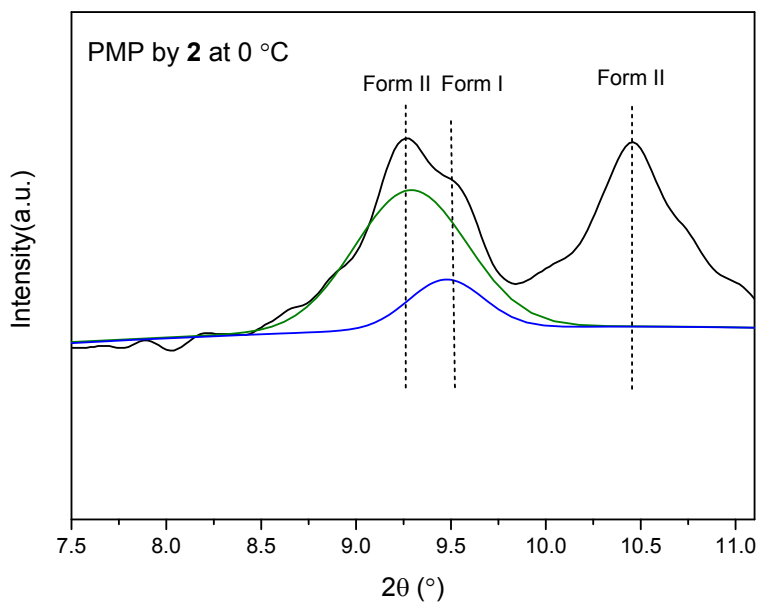

**Figure S14.** Peak separation of the X-ray diffraction patterns by **2** at 0 °C.

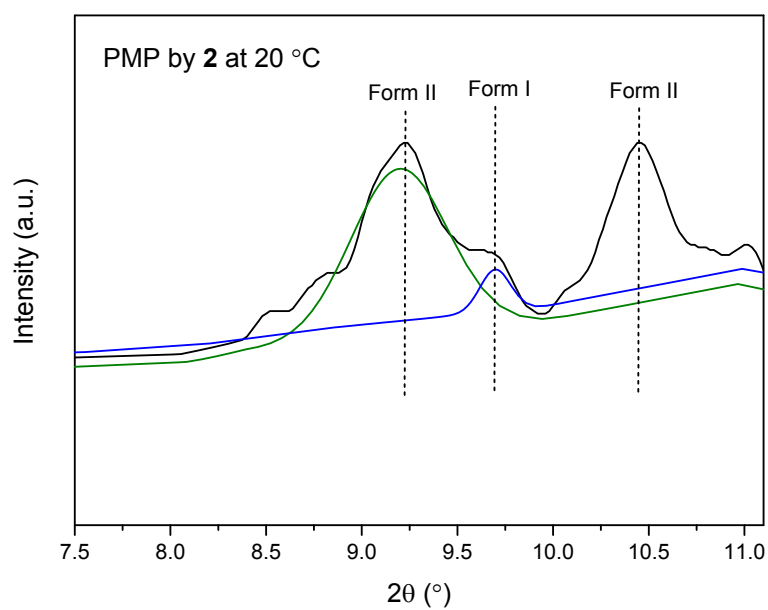

**Figure S15.** Peak separation of the X-ray diffraction patterns by **2** at 20 °C.

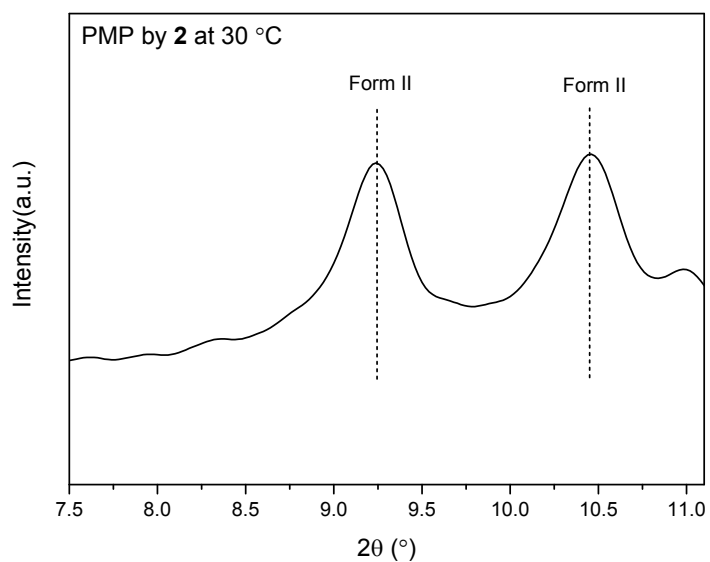

**Figure S16.** Peak separation of the X-ray diffraction patterns by **2** at 30 °C.

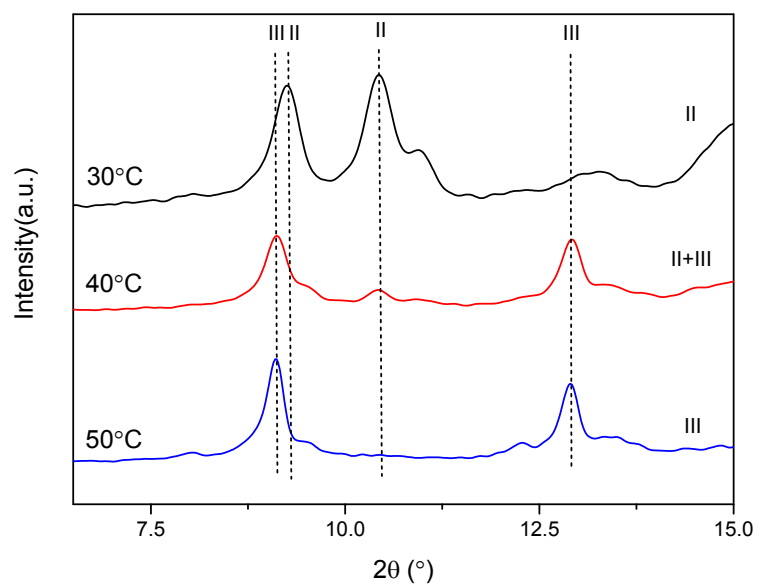

**Figure S17.** X-ray powder diffraction patterns of PMPs produced by **3** at different temperatures.

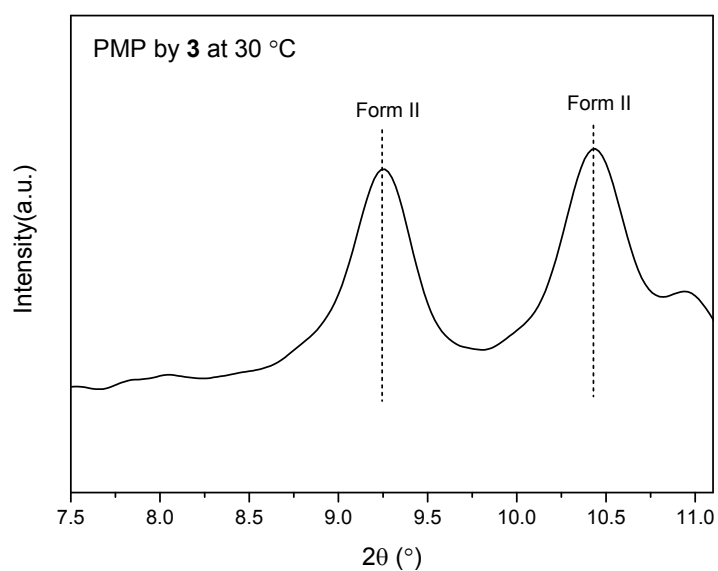

**Figure S18.** Peak separation of the X-ray diffraction patterns by **3** at 30 °C.

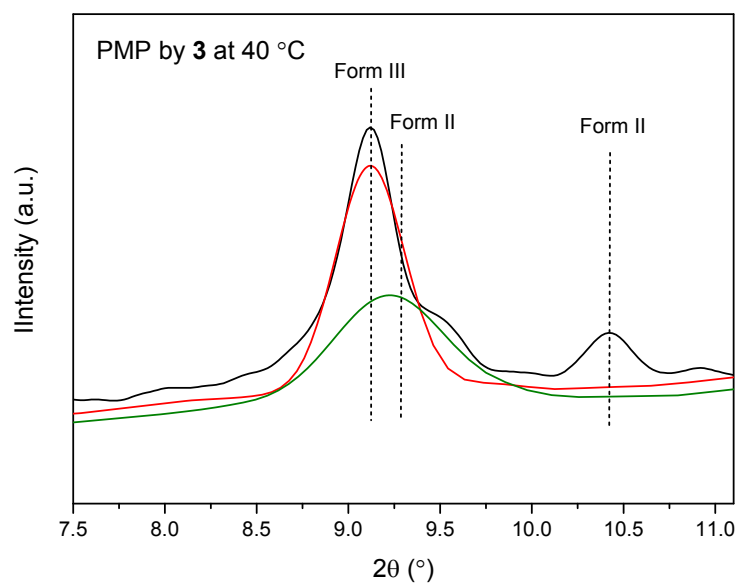

**Figure S19.** Peak separation of the X-ray diffraction patterns by **3** at 40 °C.

**Table S1.** Diffraction angles  $2\theta$  and Bragg spacings  $d$  of the reflections observed in the XRD patterns of the PMPs

| Form I        |         |          | Form II       |         |                     | Form III      |         |          |
|---------------|---------|----------|---------------|---------|---------------------|---------------|---------|----------|
| $2\theta$ (°) | $d$ (Å) | (hkl)    | $2\theta$ (°) | $d$ (Å) | (hkl)               | $2\theta$ (°) | $d$ (Å) | (hkl)    |
| 9.48          | 9.32    | 200      | 9.26          | 9.54    | 100                 | 9.08          | 9.73    | 200      |
| 13.44         | 6.58    | 220      | 10.44         | 8.47    | 020                 | 12.92         | 6.85    | 220      |
| 16.70         | 5.30    | 212      | 10.96         | 8.07    | $1\bar{2}0$         | 16.30         | 5.43    | 211      |
| 18.34         | 4.83    | 321      | 13.26         | 6.67    | 011                 | 18.32         | 4.84    | 400      |
| 20.66         | 4.30    | 113, 411 | 15.00         | 5.90    | $1\bar{1}1$         | 20.78         | 4.27    | 420, 321 |
| 21.66         | 4.10    | 322, 203 | 16.34         | 5.42    | 021, $1\bar{2}1$    | 22.74         | 3.91    | 411      |
|               |         |          | 17.40         | 5.09    | 111, $2\bar{2}0$    | 26.36         | 3.38    | 431, 501 |
|               |         |          | 18.56         | 4.78    | 200                 |               |         |          |
|               |         |          | 19.70         | 4.50    | 031                 |               |         |          |
|               |         |          | 20.44         | 4.34    | 040, 121            |               |         |          |
|               |         |          | 21.24         | 4.18    | $2\bar{2}1$         |               |         |          |
|               |         |          | 22.78         | 3.90    | $2\bar{3}1$ , $141$ |               |         |          |
|               |         |          | 24.28         | 3.66    | 041                 |               |         |          |
|               |         |          | 25.80         | 3.45    | 140, $1\bar{1}2$    |               |         |          |

The data taken from references Macromolecules 1994, 27, 3864-3868; Macromolecules 2003, 36, 6087-6094; Polymer, 1987, 28, 1321; ACS Appl. Mater. Inter. 2011, 3, 969-977.

**Table S2.** Diffraction angles  $2\theta$  and Bragg spacings  $d$  of the reflections observed in the XRD patterns of the PMPs

| <b>Form IV</b> |         |          | <b>Form V</b> |         |       |
|----------------|---------|----------|---------------|---------|-------|
| $2\theta$ (°)  | $d$ (Å) | (hkl)    | $2\theta$ (°) | $d$ (Å) | (hkl) |
| 8.05           | 10.98   | 110      | 8.54          | 10.35   |       |
| 9.40           | 9.40    | 200      | 12.08         | 7.32    |       |
| 12.10          | 7.31    | 210      | 15.29         | 5.79    |       |
| 16.40          | 5.40    | 310      | 16.16         | 5.48    |       |
| 18.20          | 4.87    | 211      | 17.10         | 5.18    |       |
| 21.15          | 4.20    | 311      | 17.58         | 5.04    |       |
| 24.50          | 3.63    | 401      | 18.43         | 4.81    |       |
| 26.85          | 3.32    | 411      | 19.24         | 4.61    |       |
| 28.35          | 3.15    | 511      | 19.49         | 4.55    |       |
| 29.50          | 3.03    | 202, 212 | 21.34         | 4.16    |       |
| 36.40          | 2.47    | 531, 701 | 25.00         | 3.56    |       |
|                |         |          | 28.13         | 3.17    |       |

The data of Form IV taken from references Macromolecules 1999, 32, 935–938; ACS Appl. Mater. Inter. 2011, 3, 969–977. The data of Form V taken from references Macromolecules 1981, 14, 1390–1394; Polymer 1984, 25, 1619–1625.

## References:

1. De Rosa, C.; Borriello, A.; Venditto, V.; Corradini, P. Crystal Structure of Form III and the Polymorphism of Isotactic Poly(4-methylpentene-1). *Macromolecules* **1994**, *27*, 3864–3868.
2. De Rosa, C. Crystal Structure of Form II of Isotactic Poly(4-methyl-1-pentene). *Macromolecules* **2003**, *36*, 6087–6094.
3. Charlet, G.; Delmas, G. Effect of solvent on the polymorphism of poly(4-methylpentene-1): 2. Crystallization in semi-dilute solutions. *Polymer*, **1987**, *28*, 1321.
4. Daniel, C.; Vitillo, J. G.; Fasano, G.; Guerra, G. Aerogels and Polymorphism of Isotactic Poly(4-methyl-pentene-1). *ACS Appl. Mater. Interfaces* **2011**, *3*, 969–977.
5. De Rosa, C. Chain Conformation of Form IV of Isotactic Poly(4-methyl-1-pentene). *Macromolecules* **1999**, *32*, 935–938.
6. Aharoni, S. M.; Charlet, G.; Delmas, G. Investigation of solutions and gels of poly(4-methyl-1-pentene) in cyclohexane and decalin by viscosimetry, calorimetry, and x-ray diffraction. A new crystalline form of poly(4-methyl-1-pentane) from gels. *Macromolecules* **1981**, *14*, 1390–1394.
7. Charlet, G.; Delmas, G. Effect of Solvent on the Polymorphism of Poly(4-methylpentene-1): 2. Crystallization in Semi-dilute Solutions. *Polymer* **1984**, *25*, 1619–1625.
